# Supplementary material for: Auditory Processing of Speech and Tones in Children With Tuberous Sclerosis Complex
Source: Front Integr Neurosci. 2020 Apr 9;14:14. doi: 10.3389/fnint.2020.00014 (PMC7161665; doi:10.3389/fnint.2020.00014)
Supplement: TABLE S1 — Detailed presentation of statistical analyses for each of the results depicted in the figures, including both traditional and Bayesian approaches. [file Table_1.XLSX]

## Sheet: Sheet1
Figure	Analysis	N	Statistical Test	Results	Post Hoc Test	Results	Test of Equal Variance	Bayesian Factor (as per Jarosz & Wiley, 2014)	Post-Hoc Bayesian Analysis
Figure 3	MVPA
	Early Decoding (100-250ms)	TD: n=9 TSC: n=9	Linear Mixed Effects Model LME and ANOVA (Stimulus x Diagnosis)	Interaction: F(1, 32)=6.373, p=0.0168 Diagnosis: F(1,32)=3.427, p=0.0734 Stimulus: F(1,32)=1.150, p=0.292	t-test	TD: t(8)=2.853, p=0.0214 TSC: t(8)=-0.880, p=0.404
	Late Decoding (250-500ms)	TD: n=9 TSC: n=9	Linear Mixed Effects Model LME and ANOVA (Stimulus x Diagnosis)	Interaction: F(1, 32)=2.0546, p=0.164 Diagnosis: F(1,32)=4.173, p=0.0493 Stimulus: F(1,32)=0.436, p=0.514	t-test	t(34)=1.997, p=0.0539
a	Speech v. Speech (Against Chance)	TD: n=9	t-test	TD (early): t(8)=1.0970, p=0.176
		TSC: n=9	t-test	TSC (early): t(8)=1.859, p=0.133
		TD: n=9	t-test	TD (late): t(8)=2.459, p=0.0428
		TSC: n=9	t-test	TSC (late): t(8)= 1.896, p=0.133
b	Tone v. Tone (Against Chance)	TD: n=9	t-test	TD (early): t(8)= 0.988, p=0.176
		TSC: n=9	t-test	TSC (early): t(8)=2.0459, p=0.133
		TD: n=9	t-test	TD (late): t(8)=0.997, p=0.176
		TSC: n=9	t-test	TSC (late): t(8)=0.888, p=0.400
c	Speech v. Tone (Against Chance)	TD: n=9	t-test	TD (early): t(8)=4.854, p=0.0051
		TSC: n=9	t-test	TSC (early): t(8)=0.704, p=.401
		TD: n=9	t-test	TD (late): t(8)=3.400, p=0.0187
		TSC: n=9	t-test	TSC (late): t(8)=0.510, p=0.416
d	Speech v. Tone (All Stimuli)	TD: n=9	t-test	TD (early): t(8)=2.853, p=0.0428
		TSC: n=9	t-test	TSC (early): t(8)=-0.880, p=0.416
		TD: n=9	t-test	TD (late): t(8)=1.603, p=0.176
		TSC: n=9	t-test	TSC (late): t(8)=-0.535, p=0.607
Figure 4	AEP components	"
b	P1 amplitude	TD: n=9 TSC: n=9	TWO-WAY RM ANOVA (Stimulus x Diagosis)	Interaction: F(1,16)=1.947, p=0.182 Diagnosis: F(1,16)=1.712, p=0.209 Stimulus: F(1, 16)=6.34, p=0.0229	Sidak's Multiple Comparisons (TD vs. TSC)	TD: t(16)=2.767, p=0.027 TSC: t(16)=0.0273, p=0.686	Levene's Test of Equal Variance Tones: F(1,16)=0.729, p=0.406 Vowels: F(1,16)=0.172, p=0.684	Bayes Factor (TD)=0.142 (SUBSTANTIAL FOR H1) Bayes Factor (TSC)=3.314	Bayesian Related-Sample t-test (TD tones vs. vowels, TSC tones vs. vowels) TD: t(8)=-3.42, p=0.009; Bayes Factor= 0.142 TSC: t(8)=-0.683, p=0.514; Bayes Factor= 3.314
	P1 latency	TD: n=9 TSC: n=9	TWO-WAY RM ANOVA (Stimulus x Diagnosis)	Interaction: F(1,16)=0.0532, p=0.821 Diagnosis: F(1,16)=1.338, p=0.264 Stimulus: F(1,16)=0.938, p=0.347	-	-	Levene's Test of Equal Variance Tones: F(1,16)=0.856, p=0.369 Vowels: F(1,16)=0.745, p=0.401	Bayes Factor (TD)=3.674 Bayes Factor (TSC)=0.022 ( STRONG FOR H1)	Bayesian Related-Sample t-test (TD tones vs. vowels, TSC tones vs. vowels) TD: t(8)=-0.491, p=0.637; Bayes Factor=3.674 TSC: t(8)=-4.994, p=0.001, Bayes Factor=0.022
	N2 amplitude	TD: n=9 TSC: n=9	TWO-WAY RM ANOVA (Stimulus x Diagnosis)	Interaction: F(1,16)=2.325, p=0.147 Diagnosis: F(1, 16) = 6.736, p=0.0195 Stimulus: F(1,16)=1.66, p=0.216	Sidak's Multiple Comparisons (Vowels v. Tones)	Tones: t(32)=1.70, p=0.187 Vowels: t(32)=3.00, p=0.0104	Levene's Test of Equal Variance Tones: F(1,16)=0.247, p=0.626 Vowels: F(1,16)=2.513, p=0.132	Bayes Factor (Tones)=0.132 (SUBSTANTIAL FOR H1) Bayes Factor (Vowels)=0.106 (SUBSTANTIAL FOR H1)	Bayesian Independent Samples Normal t-test (Tones TD vs. TSC, Vowels TD vs. TSC ) Tones: t(16)=-1.586, p=0.132; Bayes Factor= 0.132 Vowels: t(16)=-3.252, p=.005; Bayes Factor= 0.106
						Tones: t(32)=1.701, p=0.187
	N2 latency	TD: n=9 TSC: n=9	TWO-WAY RM ANOVA (Stimulus x Diagnosis)	Interaction: F(1,16)=0.754, p=0.398 Diagnosis: F(1,16)=1.877, p=0.190 Stimulus: F(1,16)=3.489, p=0.0802	-	-	Levene's Test of Equal Variance Tones: F(1,16)=0.856, p=0.369 Vowels: F(1,16)=0.745, p=0.401	Bayes Factor (TD)=3.656 Bayes Factor (TSC)=2.882	Bayesian Related-Sample t-test (TD tones vs. vowels, TSC tones vs. vowels) TD: t(8)=-0.502, p=0.629; Bayes Factor=3.656. TSC: t(8)=-0.885, p=0.402, Bayes Factor=2.882
	N4 amplitude	TD: n=9 TSC: n=9	TWO-WAY RM ANOVA (Stimulus x Diagnosis)	Interaction: F(1,16)=0.139, p=0.159 Diagnosis: F(1,16) = 2.179, p=0.159 Stimulus: F(1,16)=24.35, p=0.0001	Sidak's Multiple Comparisons (TD v. TSC)	TD: t(16)=3.753, p=0.0035 TSC: t(16)=3.226, p=0.0105	Levene's Test of Equal Variance Tones: F(1,16)=1.019, p=0.328 Vowels: F(1,16)=0.337, p=0.569	Bayes Factor (TD)= 0.055 (STRONG FOR H1) Bayes Factor (TSC)= 0.264 (SUBSTANTIAL FOR H1)	Bayesian Related-Sample t-test (TD tones vs. vowels, TSC tones vs. vowels) TD: t(8)=-4.20, p=0.003; Bayes Factor= 0.055 TSC: t(8)= -2.94, p=0.019; Bayes Factor= 0.264
	N4 latency	TD: n=9 TSC: n=9	RELATED-SAMPLES WILCOXON SIGNED RANK TEST (NONPARAMETRIC)	Stimulus: U(18)=2.548, p=0.011 Diagnosis: U(18)=0.196, p=0.845		-	Levene's Test of Equal Variance Tones: F(1,16)=10.018, p=0.006 Vowels: F(1,16)=7.818, p=0.013	Bayes Factor (TD)=3.67 Bayes Factor (TSC)=0.005 (DECISIVE FOR H1)	Bayesian Related-Sample t-test (TD tones vs. vowels, TSC tones vs. vowels) TD: t(8)=-0.491, p=0.712; Bayes Factor= 3.67 TSC: t(8)=-4.99, p=0.001; Bayes Factor= 0.022
Figure 5	MMN	"
	MMN Difference	TD: n=9 TSC: n=9	t-test (Tones)	t(16)=1.117, p=0.2861	-	-	Levene's Test of Equal Variance F(8, 8)= 1.728, p=0.4563	Bayes Factor=1.907	Bayesian Independent Samples t-test t(16)=1.117, p=0.2861; Bayes Factor = 1.907
			t-test (vowels)	t(16)=1.499, p=0.154	-	-	Levene's Test of Equal Variance F(8, 8)= 2.199, p=0.2859	Bayes Factor=1.32	Bayesian Independent Samples t-test t(16)=1.499, p=0.154; Bayes Factor= 1.32
		TD: n= 9 TSC - ASD: n=5 TSC + ASD: n=4	ONE-WAY ANOVA (Tones)	F(2, 15)=0.929, p=0.4164	-	-	Levene's Test of Equal Variance F(2, 15)= 1.066, p= 0.3692	Bayes Factor (TD/TSC - ASD)=2.372 Bayes Factor (TD/TSC + ASD)=1.48	Bayesian Independent Samples t-test TD/TSC - ASD: t(12)=-0.620, p=0.547; Bayes Factor=2.372 TD/TSC + ASD: t(11)=-1.265, p=0.232; Bayes Factor=1.480
			ONE-WAY ANOVA (Vowels)	F(2, 15)=5.611, p=0.0152	Dunnet's Multiple Comparisons	TD vs. TSC+G34:J3494, p>0.999 TD vs. TSC + ASD: q(15)=p=0.0120, p=0.0120	Levene's Test of Equal Variance F(2, 15)= 0.0187, p=0.982	Bayes Factor (TD/TSC - ASD)=2.746 Bayes Factor (TD/TSC + ASD)=0.136 (STRONG FOR H1)	Bayesian Independent Samples t-test TD/TSC - ASD: t(12)=-0.007, p=0.995; Bayes Factor=2.746 TD/TSC + ASD: t(11)=-3.302, p=0.007; Bayes Factor=0.136
